# Supplementary material for: BaCu2MIVQ4(MIV= Si, Ge, and Sn; Q = S, Se): synthesis, crystal structures, optical performances and theoretical calculations
Source: Royal Society of Chemistry journal article supplement (doi:10.1039/c7ra05022d), 2017-01-01
Supplement: c7ra05022d1.pdf [file c7ra05022d1.pdf]

## Supporting Information

### **BaCu<sub>2</sub>M<sup>IV</sup>Q<sub>4</sub> (M<sup>IV</sup> = Si, Ge, and Sn; Q = S, Se): synthesis, crystal structures, optical performances and theoretical calculations**

Leyan Nian,<sup>a,b</sup> Junben Huang,<sup>b</sup> Kui Wu,<sup>\*b</sup> Zhi Su,<sup>\*a</sup> Zhihua Yang<sup>b</sup> and Shilie Pan<sup>\*a,b</sup>

*<sup>a</sup>College of Chemistry and Chemical Engineering, Xinjiang Normal University,  
Urumqi, Xinjiang 830054, China*

*<sup>b</sup>Key Laboratory of Functional Materials and Devices for Special Environments of  
CAS, Xinjiang Key Laboratory of Electronic Information Materials and Devices,  
Xinjiang Technical Institute of Physics & Chemistry of CAS, 40-1 South Beijing Road,  
Urumqi 830011, China.*

\*To whom correspondence should be addressed.

E-mail: slpan@ms.xjb.ac.cn

Phone: (+86)991-3674558, Fax: (+86)991-3838957

## List of Figures & Tables

**Table S1(a)** Atomic coordinates ( $\times 10^4$ ), equivalent isotropic displacement parameters ( $\text{\AA}^2 \times 10^3$ ) for  $\text{BaCu}_2\text{SiSe}_4$ .  $U(\text{eq})$  is defined as one third of the trace of the orthogonalized  $U_{ij}$  tensor.

**Table S1(b)** Atomic coordinates ( $\times 10^4$ ), equivalent isotropic displacement parameters ( $\text{\AA}^2 \times 10^3$ ) for  $\text{BaCu}_2\text{GeSe}_4$ .  $U(\text{eq})$  is defined as one third of the trace of the orthogonalized  $U_{ij}$  tensor.

**Table S1(c)** Atomic coordinates ( $\times 10^4$ ), equivalent isotropic displacement parameters ( $\text{\AA}^2 \times 10^3$ ) for  $\text{BaCu}_2\text{GeSe}_4$ .  $U(\text{eq})$  is defined as one third of the trace of the orthogonalized  $U_{ij}$  tensor.

**Table S1(d)** Atomic coordinates ( $\times 10^4$ ), equivalent isotropic displacement parameters ( $\text{\AA}^2 \times 10^3$ ) for  $\text{BaCu}_2\text{SnS}_4$ .  $U(\text{eq})$  is defined as one third of the trace of the orthogonalized  $U_{ij}$  tensor.

**Table S1(e)** Atomic coordinates ( $\times 10^4$ ), equivalent isotropic displacement parameters ( $\text{\AA}^2 \times 10^3$ ) for  $\text{BaCu}_2\text{SnSe}_4$ .  $U(\text{eq})$  is defined as one third of the trace of the orthogonalized  $U_{ij}$  tensor.

**Table S2(a)** Bond lengths ( $\text{\AA}$ ) and angles ( $^\circ$ ) for  $\text{BaCu}_2\text{SiSe}_4$ .

**Table S2(b)** Bond lengths ( $\text{\AA}$ ) and angles ( $^\circ$ ) for  $\text{BaCu}_2\text{GeSe}_4$ .

**Table S2(c)** Bond lengths ( $\text{\AA}$ ) and angles ( $^\circ$ ) for  $\text{BaCu}_2\text{GeSe}_4$ .

**Table S2(d)** Bond lengths ( $\text{\AA}$ ) and angles ( $^\circ$ ) for  $\text{BaCu}_2\text{SnS}_4$ .

**Table S2(e)** Bond lengths ( $\text{\AA}$ ) and angles ( $^\circ$ ) for  $\text{BaCu}_2\text{SnSe}_4$ .

**Table S3** Calculated NLO SHG coefficients and percentage of VH (Virtual-Hole) and VE (Virtual-Electron) in  $\text{BaCu}_2\text{M}^{\text{IV}}\text{Q}_4$  ( $\text{M}^{\text{IV}} = \text{Si, Ge, and Sn; Q} = \text{S, Se}$ ).

**Fig. S1(a)** Powder XRD patterns of  $\text{BaCu}_2\text{SiSe}_4$ .

**Fig. S1(b)** Powder XRD patterns of  $\text{BaCu}_2\text{GeSe}_4$ .

**Fig. S1(c)** Powder XRD patterns of  $\text{BaCu}_2\text{GeSe}_4$ .

**Fig. S1(d)** Powder XRD patterns of  $\text{BaCu}_2\text{SnS}_4$ .

**Fig. S1(e)** Powder XRD patterns of  $\text{BaCu}_2\text{SnSe}_4$ .

**Fig. S2(a)** The IR spectrum of as-synthesized  $\text{BaCu}_2\text{SiSe}_4$ .

**Fig. S2(b)** The IR spectrum of as-synthesized  $\text{BaCu}_2\text{GeSe}_4$ .

**Fig. S2(c)** The IR spectrum of as-synthesized  $\text{BaCu}_2\text{GeSe}_4$ .

**Fig. S2(d)** The IR spectrum of as-synthesized  $\text{BaCu}_2\text{SnS}_4$ .

**Fig. S2(e)** The IR spectrum of as-synthesized  $\text{BaCu}_2\text{SnSe}_4$ .

**Fig. S3(a)** Absorption spectrum of  $\text{BaCu}_2\text{SiSe}_4$ . The inset diagram is the experimental band gap.

**Fig. S3(b)** Absorption spectrum of  $\text{BaCu}_2\text{GeSe}_4$ . The inset diagram is the experimental band gap.

**Fig. S3(c)** Absorption spectrum of  $\text{BaCu}_2\text{GeSe}_4$ . The inset diagram is the experimental band gap.

**Fig. S3(d)** Absorption spectrum of  $\text{BaCu}_2\text{SnSe}_4$ . The inset diagram is the experimental band gap.

**Fig. S4** SHG response for title compounds in different particle sizes (AgGaS<sub>2</sub> as the reference).

**Fig. S5(a)** The electronic structure of BaCu<sub>2</sub>SiSe<sub>4</sub>.

**Fig. S5(b)** The electronic structure of BaCu<sub>2</sub>GeS<sub>4</sub>.

**Fig. S5(c)** The electronic structure of BaCu<sub>2</sub>GeSe<sub>4</sub>.

**Fig. S5(d)** The electronic structure of BaCu<sub>2</sub>SnSe<sub>4</sub>.

**Fig. S6(a)** The PDOS of BaCu<sub>2</sub>SiSe<sub>4</sub>.

**Fig. S6(b)** The PDOS of BaCu<sub>2</sub>GeS<sub>4</sub>.

**Fig. S6(c)** The PDOS of BaCu<sub>2</sub>GeSe<sub>4</sub>.

**Fig. S6(d)** The PDOS of BaCu<sub>2</sub>SnSe<sub>4</sub>.

**Fig. S7(a)** SHG density of BaCu<sub>2</sub>GeS<sub>4</sub>.

**Fig. S7(b)** SHG density of BaCu<sub>2</sub>GeSe<sub>4</sub>.

**Fig. S7(c)** SHG density of BaCu<sub>2</sub>SiSe<sub>4</sub>.

**Fig. S7(d)** SHG density of BaCu<sub>2</sub>SnSe<sub>4</sub>.

**Table S1(a)** Atomic coordinates ( $\times 10^4$ ), equivalent isotropic displacement parameters ( $\text{\AA}^2 \times 10^3$ ) for  $\text{BaCu}_2\text{SiSe}_4$ .  $U(\text{eq})$  is defined as one third of the trace of the orthogonalized  $U_{ij}$  tensor.

| Atoms | Wyck. | $x$      | $y$     | $z$     | $U(\text{eq})$ | BVS  |
|-------|-------|----------|---------|---------|----------------|------|
| Ba(1) | 3a    | 5496(1)  | 10000   | 6667    | 14(1)          | 2.46 |
| Cu(1) | 6c    | 9203(2)  | 5863(2) | 5767(1) | 23(1)          | 0.85 |
| Se(1) | 6c    | 6748(1)  | 7671(1) | 8276(1) | 12(1)          | 1.99 |
| Se(2) | 6c    | 10283(1) | 5168(1) | 7220(1) | 12(1)          | 2.06 |
| Si(1) | 3b    | 10000    | 7165(5) | 8333    | 9(1)           | 3.94 |

**Table S1(b)** Atomic coordinates ( $\times 10^4$ ), equivalent isotropic displacement parameters ( $\text{\AA}^2 \times 10^3$ ) for  $\text{BaCu}_2\text{GeS}_4$ .  $U(\text{eq})$  is defined as one third of the trace of the orthogonalized  $U_{ij}$  tensor.

| Atoms | Wyck | $x$     | $y$      | $z$     | $U(\text{eq})$ | BVS  |
|-------|------|---------|----------|---------|----------------|------|
| Ba(1) | 3b   | 0       | 4361(1)  | 1667    | 12(1)          | 2.49 |
| Cu(1) | 6c   | 4104(1) | 749(1)   | 766(1)  | 21(1)          | 1.11 |
| Ge(1) | 3a   | 7142(1) | 7142(1)  | 0       | 9(1)           | 4.01 |
| S(1)  | 6c   | 5178(2) | 4805(2)  | 1131(1) | 11(1)          | 2.13 |
| S(2)  | 6c   | 7628(2) | 10930(2) | 35(1)   | 11(1)          | 2.23 |

**Table S1(c)** Atomic coordinates ( $\times 10^4$ ), equivalent isotropic displacement parameters ( $\text{\AA}^2 \times 10^3$ ) for  $\text{BaCu}_2\text{GeSe}_4$ .  $U(\text{eq})$  is defined as one third of the trace of the orthogonalized  $U_{ij}$  tensor.

| Atoms | Wyck. | $x$        | $y$        | $z$       | $U(\text{eq})$ | BVS  |
|-------|-------|------------|------------|-----------|----------------|------|
| Ba(1) | 3a    | 4497.2(12) | 4497.2(12) | 0         | 12(2)          | 2.30 |
| Cu(1) | 6c    | 6608.(2)   | 797.(2)    | 8999(7)   | 21(3)          | 0.86 |
| Ge(1) | 3b    | 10000      | 7149(2)    | 1666.7    | 8(3)           | 3.92 |
| Se(1) | 6c    | 9669.4(16) | 4781.8(15) | 523.9(5)  | 10(2)          | 1.95 |
| Se(2) | 6c    | 6662.5(15) | 7675.0(16) | 1710.5(5) | 10(3)          | 2.02 |

**Table S1(d)** Atomic coordinates ( $\times 10^4$ ), equivalent isotropic displacement parameters ( $\text{\AA}^2 \times 10^3$ ) for  $\text{BaCu}_2\text{SnS}_4$ .  $U(\text{eq})$  is defined as one third of the trace of the orthogonalized  $U_{ij}$  tensor.

| Atoms | Wyck. | $x$     | $y$     | $z$     | $U(\text{eq})$ | BVS  |
|-------|-------|---------|---------|---------|----------------|------|
| Ba(1) | 3a    | 4324(1) | 4324(1) | 0       | 14(1)          | 2.24 |
| Cu(1) | 6c    | 728(2)  | 6536(2) | 893(1)  | 23(1)          | 1.12 |
| S(1)  | 6c    | 4575(4) | 9522(4) | 478(1)  | 13(1)          | 2.12 |
| S(2)  | 6c    | 7650(4) | 6548(4) | 1670(1) | 13(1)          | 2.20 |
| Sn(1) | 3b    | 7095(1) | 10000   | 1667    | 11(1)          | 4.13 |

**Table S1(e)** Atomic coordinates ( $\times 10^4$ ), equivalent isotropic displacement parameters ( $\text{\AA}^2 \times 10^3$ ) for  $\text{BaCu}_2\text{SnSe}_4$ .  $U(\text{eq})$  is defined as one third of the trace of the orthogonalized  $U_{ij}$  tensor.

| Atoms | Wyck. | $x$     | $y$     | $z$     | $U(\text{eq})$ | BVS  |
|-------|-------|---------|---------|---------|----------------|------|
| Ba(1) | 4a    | 0       | 5000    | 4992(1) | 15(1)          | 2.23 |
| Cu(1) | 8c    | 1285(1) | 2853(1) | 862(2)  | 23(1)          | 0.84 |
| Se(1) | 4b    | 2500    | 1096(1) | 2189(2) | 13(1)          | 1.88 |
| Se(2) | 4b    | 2500    | -588(1) | 7456(2) | 13(1)          | 1.97 |
| Se(3) | 8c    | 717(1)  | 2525(1) | 7415(2) | 13(1)          | 1.95 |
| Sn(1) | 4b    | 2500    | 1476(1) | 5865(1) | 12(1)          | 3.82 |

**Table S2(a)** Bond lengths (Å) and angles (°) for BaCu<sub>2</sub>SiSe<sub>4</sub>.

|                       |             |                         |             |
|-----------------------|-------------|-------------------------|-------------|
| Ba(1)-Se(1)           | 3.2843(15)  | Se(1)#3-Ba(1)-Se(2)#5   | 82.26(2)    |
| Ba(1)-Se(1)#1         | 3.2843(15)  | Se(2)#4-Ba(1)-Se(2)#5   | 129.61(3)   |
| Ba(1)-Se(1)#2         | 3.3108(16)  | Se(1)-Ba(1)-Se(2)#6     | 74.20(2)    |
| Ba(1)-Se(1)#3         | 3.3108(17)  | Se(1)#1-Ba(1)-Se(2)#6   | 141.103(18) |
| Ba(1)-Se(2)#4         | 3.3232(12)  | Se(1)#2-Ba(1)-Se(2)#6   | 67.74(2)    |
| Ba(1)-Se(2)#5         | 3.3232(12)  | Se(1)#3-Ba(1)-Se(2)#6   | 79.46(3)    |
| Ba(1)-Se(2)#6         | 3.3508(12)  | Se(2)#4-Ba(1)-Se(2)#6   | 148.21(3)   |
| Ba(1)-Se(2)#7         | 3.3508(12)  | Se(2)#5-Ba(1)-Se(2)#6   | 66.799(13)  |
| Cu(1)-Se(2)#5         | 2.4285(14)  | Se(1)-Ba(1)-Se(2)#7     | 141.103(18) |
| Cu(1)-Se(1)#8         | 2.4286(15)  | Se(1)#1-Ba(1)-Se(2)#7   | 74.20(2)    |
| Cu(1)-Se(1)#9         | 2.5045(14)  | Se(1)#2-Ba(1)-Se(2)#7   | 79.46(3)    |
| Cu(1)-Se(2)           | 2.5391(18)  | Se(1)#3-Ba(1)-Se(2)#7   | 67.738(19)  |
| Si(1)-Se(2)#14        | 2.263(2)    | Se(2)#4-Ba(1)-Se(2)#7   | 66.799(13)  |
| Si(1)-Se(1)#14        | 2.269(2)    | Se(2)#5-Ba(1)-Se(2)#7   | 148.21(3)   |
| Se(1)-Ba(1)-Se(1)#1   | 123.62(4)   | Se(2)#6-Ba(1)-Se(2)#7   | 115.23(3)   |
| Se(1)-Ba(1)-Se(1)#2   | 69.44(4)    | Se(2)#5-Cu(1)-Se(1)#8   | 132.69(5)   |
| Se(1)#1-Ba(1)-Se(1)#2 | 147.85(2)   | Se(2)#5-Cu(1)-Se(1)#9   | 108.47(5)   |
| Se(1)-Ba(1)-Se(1)#3   | 147.85(2)   | Se(1)#8-Cu(1)-Se(1)#9   | 99.17(4)    |
| Se(1)#1-Ba(1)-Se(1)#3 | 69.44(4)    | Se(2)#5-Cu(1)-Se(2)     | 95.36(4)    |
| Se(1)#2-Ba(1)-Se(1)#3 | 116.75(5)   | Se(1)#8-Cu(1)-Se(2)     | 117.98(5)   |
| Se(1)-Ba(1)-Se(2)#4   | 85.92(2)    | Se(1)#9-Cu(1)-Se(2)     | 98.53(5)    |
| Se(1)#1-Ba(1)-Se(2)#4 | 70.67(3)    | Se(2)-Si(1)-Se(1)#14    | 110.03(3)   |
| Se(1)#2-Ba(1)-Se(2)#4 | 82.26(2)    | Se(2)#14-Si(1)-Se(1)#14 | 112.92(3)   |
| Se(1)#3-Ba(1)-Se(2)#4 | 125.534(17) | Se(2)-Si(1)-Se(1)       | 112.92(3)   |
| Se(1)-Ba(1)-Se(2)#5   | 70.67(3)    | Se(2)#14-Si(1)-Se(1)    | 110.03(3)   |
| Se(1)#1-Ba(1)-Se(2)#5 | 85.92(2)    | Se(1)#14-Si(1)-Se(1)    | 105.84(13)  |
| Se(1)#2-Ba(1)-Se(2)#5 | 125.534(17) |                         |             |

Symmetry transformations used to generate equivalent atoms:

|                          |                            |                           |
|--------------------------|----------------------------|---------------------------|
| #1 $x-y+1, -y+2, -z+4/3$ | #2 $-x+1, -x+y+1, -z+5/3$  | #3 $-y+1, x-y+1, z-1/3$   |
| #4 $x, y+1, z$           | #5 $x-y, -y+1, -z+4/3$     | #6 $x-1, y, z$            |
| #7 $x-y, -y+2, -z+4/3$   | #8 $-y+2, x-y+1, z-1/3$    | #9 $x-y+1, -y+1, -z+4/3$  |
| #10 $x, y-1, z$          | #11 $x+1, y, z$            | #12 $-x+y+1, -x+2, z+1/3$ |
| #13 $-x+y, -x+1, z+1/3$  | #14 $-x+2, -x+y+1, -z+5/3$ |                           |

**Table S2(b)** Bond lengths (Å) and angles (°) for BaCu<sub>2</sub>GeS<sub>4</sub>.

|                     |            |                       |            |
|---------------------|------------|-----------------------|------------|
| Ba(1)-S(2)#1        | 3.1597(13) | S(1)#3-Ba(1)-S(2)#5   | 125.23(3)  |
| Ba(1)-S(2)#2        | 3.1597(13) | S(1)-Ba(1)-S(2)#5     | 82.87(3)   |
| Ba(1)-S(1)#3        | 3.1967(14) | S(2)#4-Ba(1)-S(2)#5   | 114.17(5)  |
| Ba(1)-S(1)          | 3.1967(13) | S(2)#1-Ba(1)-S(1)#6   | 73.35(3)   |
| Ba(1)-S(2)#4        | 3.2017(13) | S(2)#2-Ba(1)-S(1)#6   | 140.17(3)  |
| Ba(1)-S(2)#5        | 3.2017(13) | S(1)#3-Ba(1)-S(1)#6   | 148.87(4)  |
| Ba(1)-S(1)#6        | 3.2489(14) | S(1)-Ba(1)-S(1)#6     | 66.340(16) |
| Ba(1)-S(1)#7        | 3.2489(14) | S(2)#4-Ba(1)-S(1)#6   | 67.49(3)   |
| Cu(1)-S(2)#10       | 2.3162(13) | S(2)#5-Ba(1)-S(1)#6   | 77.87(3)   |
| Cu(1)-S(1)          | 2.3300(13) | S(2)#1-Ba(1)-S(1)#7   | 140.17(3)  |
| Cu(1)-S(2)#11       | 2.4164(13) | S(2)#2-Ba(1)-S(1)#7   | 73.35(3)   |
| Cu(1)-S(1)#1        | 2.4426(14) | S(1)#3-Ba(1)-S(1)#7   | 66.340(16) |
| Ge(1)-S(1)#14       | 2.2147(12) | S(1)-Ba(1)-S(1)#7     | 148.87(4)  |
| Ge(1)-S(1)          | 2.2147(12) | S(2)#4-Ba(1)-S(1)#7   | 77.87(3)   |
| Ge(1)-S(2)          | 2.2173(13) | S(2)#5-Ba(1)-S(1)#7   | 67.49(3)   |
| Ge(1)-S(2)#14       | 2.2173(13) | S(1)#6-Ba(1)-S(1)#7   | 113.87(4)  |
| S(2)#1-Ba(1)-S(2)#2 | 127.65(5)  | S(2)#10-Cu(1)-S(1)    | 134.35(5)  |
| S(2)#1-Ba(1)-S(1)#3 | 87.68(3)   | S(2)#10-Cu(1)-S(2)#11 | 99.15(3)   |
| S(2)#2-Ba(1)-S(1)#3 | 70.91(3)   | S(1)-Cu(1)-S(2)#11    | 107.51(5)  |
| S(2)#1-Ba(1)-S(1)   | 70.91(3)   | S(2)#10-Cu(1)-S(1)#1  | 116.81(5)  |
| S(2)#2-Ba(1)-S(1)   | 87.68(3)   | S(1)-Cu(1)-S(1)#1     | 95.26(3)   |
| S(1)#3-Ba(1)-S(1)   | 130.75(4)  | S(2)#11-Cu(1)-S(1)#1  | 98.72(5)   |
| S(2)#1-Ba(1)-S(2)#4 | 69.00(2)   | S(1)#14-Ge(1)-S(1)    | 105.85(7)  |
| S(2)#2-Ba(1)-S(2)#4 | 146.90(3)  | S(1)#14-Ge(1)-S(2)    | 107.91(5)  |
| S(1)#3-Ba(1)-S(2)#4 | 82.87(3)   | S(1)-Ge(1)-S(2)       | 114.46(4)  |
| S(1)-Ba(1)-S(2)#4   | 125.23(3)  | S(1)#14-Ge(1)-S(2)#14 | 114.46(4)  |
| S(2)#1-Ba(1)-S(2)#5 | 146.90(3)  | S(1)-Ge(1)-S(2)#14    | 107.91(5)  |
| S(2)#2-Ba(1)-S(2)#5 | 69.00(2)   | S(2)-Ge(1)-S(2)#14    | 106.49(7)  |

Symmetry transformations used to generate equivalent atoms:

|                     |                     |                       |
|---------------------|---------------------|-----------------------|
| #1 -x+1,-x+y,-z+1/3 | #2 x-1,y-1,z        | #3 -x,-x+y,-z+1/3     |
| #4 -y+1,x-y+1,z+1/3 | #5 y-1,x,-z         | #6 -x+1,-x+y+1,-z+1/3 |
| #7 x-1,y,z          | #8 -x,-x+y+1,-z+1/3 | #9 x,y+1,z            |
| #10 y-1,x-1,-z      | #11 x,y-1,z         | #12 x+1,y,z           |
| #13 -x+y,-x,z-1/3   | #14 y,x,-z          | #15 y+1,x+1,-z        |
| #16 x+1,y+1,z       | #17 -x+y,-x+1,z-1/3 |                       |

**Table S2(c)** Bond lengths (Å) and angles (°) for BaCu<sub>2</sub>GeSe<sub>4</sub>.

|                       |            |                       |           |
|-----------------------|------------|-----------------------|-----------|
| Ba(1)-Se(4)           | 3.3096(13) | Se(3)#1-Ba(1)-Se(2)#4 | 86.32(3)  |
| Ba(1)-Se(3)#1         | 3.3118(13) | Se(3)-Ba(1)-Se(2)#4   | 126.17(3) |
| Ba(1)-Se(3)           | 3.3281(13) | Se(4)#2-Ba(1)-Se(2)#4 | 82.51(3)  |
| Ba(1)-Se(4)#2         | 3.3303(13) | Se(1)#3-Ba(1)-Se(2)#4 | 127.61(3) |
| Ba(1)-Se(1)#3         | 3.3441(13) | Se(4)-Ba(1)-Se(2)     | 139.63(3) |
| Ba(1)-Se(2)#4         | 3.3472(13) | Se(3)#1-Ba(1)-Se(2)   | 73.53(3)  |
| Ba(1)-Se(2)           | 3.3818(12) | Se(3)-Ba(1)-Se(2)     | 78.36(3)  |
| Ba(1)-Se(1)#5         | 3.3845(12) | Se(4)#2-Ba(1)-Se(2)   | 69.83(3)  |
| Ba(1)-Cu(2)#3         | 3.6200(16) | Se(1)#3-Ba(1)-Se(2)   | 66.17(3)  |
| Ba(1)-Cu(1)#4         | 3.6240(16) | Se(2)#4-Ba(1)-Se(2)   | 150.11(4) |
| Ba(1)-Cu(2)#5         | 3.8959(16) | Se(4)-Ba(1)-Se(1)#5   | 73.53(3)  |
| Ba(1)-Cu(1)           | 3.8971(17) | Se(3)#1-Ba(1)-Se(1)#5 | 139.59(3) |
| Cu(1)-Se(1)#6         | 2.4269(18) | Se(3)-Ba(1)-Se(1)#5   | 69.81(3)  |
| Cu(1)-Se(3)           | 2.4342(17) | Se(4)#2-Ba(1)-Se(1)#5 | 78.31(3)  |
| Cu(1)-Se(4)#7         | 2.4944(18) | Se(1)#3-Ba(1)-Se(1)#5 | 150.14(4) |
| Cu(1)-Se(2)           | 2.541(2)   | Se(2)#4-Ba(1)-Se(1)#5 | 66.15(3)  |
| Cu(2)-Se(2)#1         | 2.4266(18) | Se(2)-Ba(1)-Se(1)#5   | 116.75(3) |
| Cu(2)-Se(4)#8         | 2.4363(18) | Se(1)#6-Cu(1)-Se(3)   | 132.96(7) |
| Cu(2)-Se(3)#8         | 2.4944(18) | Se(1)#6-Cu(1)-Se(4)#7 | 109.02(6) |
| Cu(2)-Se(1)           | 2.536(2)   | Se(3)-Cu(1)-Se(4)#7   | 99.27(6)  |
| Ge(1)-Se(1)           | 2.3519(16) | Se(1)#6-Cu(1)-Se(2)   | 95.34(6)  |
| Ge(1)-Se(2)           | 2.3550(16) | Se(3)-Cu(1)-Se(2)     | 116.84(7) |
| Ge(1)-Se(3)#9         | 2.3605(15) | Se(4)#7-Cu(1)-Se(2)   | 98.97(6)  |
| Ge(1)-Se(4)#2         | 2.3605(15) | Se(2)#1-Cu(2)-Se(4)#8 | 132.82(7) |
| Se(4)-Ba(1)-Se(3)#1   | 125.75(3)  | Se(2)#1-Cu(2)-Se(3)#8 | 109.01(6) |
| Se(4)-Ba(1)-Se(3)     | 68.85(3)   | Se(4)#8-Cu(2)-Se(3)#8 | 99.11(6)  |
| Se(3)#1-Ba(1)-Se(3)   | 146.81(3)  | Se(2)#1-Cu(2)-Se(1)   | 95.42(6)  |
| Se(4)-Ba(1)-Se(4)#2   | 146.75(3)  | Se(4)#8-Cu(2)-Se(1)   | 117.01(7) |
| Se(3)#1-Ba(1)-Se(4)#2 | 68.86(3)   | Se(3)#8-Cu(2)-Se(1)   | 99.11(6)  |
| Se(3)-Ba(1)-Se(4)#2   | 117.10(3)  | Se(1)-Ge(1)-Se(2)     | 105.07(5) |
| Se(4)-Ba(1)-Se(1)#3   | 86.33(3)   | Se(1)-Ge(1)-Se(3)#9   | 109.21(6) |
| Se(3)#1-Ba(1)-Se(1)#3 | 70.22(3)   | Se(2)-Ge(1)-Se(3)#9   | 113.93(6) |
| Se(3)-Ba(1)-Se(1)#3   | 82.56(3)   | Se(1)-Ge(1)-Se(4)#2   | 114.08(6) |
| Se(4)#2-Ba(1)-Se(1)#3 | 126.21(3)  | Se(2)-Ge(1)-Se(4)#2   | 109.14(6) |
| Se(4)-Ba(1)-Se(2)#4   | 70.21(3)   | Se(3)#9-Ge(1)-Se(4)#2 | 105.63(5) |

Symmetry transformations used to generate equivalent atoms:

|                       |                      |                      |
|-----------------------|----------------------|----------------------|
| #1 -x+y,-x+1,z-1/3    | #2 -x+y+1,-x+2,z-1/3 | #3 -y+1,x-y+1,z+1/3  |
| #4 x+1,y,z            | #5 -y+2,x-y+2,z+1/3  | #6 -y+1,x-y+2,z+1/3  |
| #7 x-1,y,z            | #8 -y+1,x-y+1,z-2/3  | #9 -x+y,-x+2,z-1/3   |
| #10 -x+y-1,-x+1,z-1/3 | #11 -x+y,-x+1,z+2/3  | #12 -y+2,x-y+1,z+1/3 |



**Table S2(d)** Bond lengths (Å) and angles (°) for BaCu<sub>2</sub>SnS<sub>4</sub>.

|                     |           |                       |            |
|---------------------|-----------|-----------------------|------------|
| Ba(1)-S(2)#1        | 3.203(3)  | S(1)#4-Ba(1)-S(2)#5   | 126.73(5)  |
| Ba(1)-S(2)#2        | 3.203(3)  | S(2)-Ba(1)-S(2)#5     | 113.81(9)  |
| Ba(1)-S(1)#3        | 3.223(3)  | S(2)#1-Ba(1)-S(1)     | 136.92(5)  |
| Ba(1)-S(1)#4        | 3.223(3)  | S(2)#2-Ba(1)-S(1)     | 72.17(5)   |
| Ba(1)-S(2)          | 3.229(3)  | S(1)#3-Ba(1)-S(1)     | 65.09(3)   |
| Ba(1)-S(2)#5        | 3.229(3)  | S(1)#4-Ba(1)-S(1)     | 152.85(7)  |
| Ba(1)-S(1)          | 3.313(3)  | S(2)-Ba(1)-S(1)       | 71.53(5)   |
| Ba(1)-S(1)#5        | 3.313(3)  | S(2)#5-Ba(1)-S(1)     | 75.30(6)   |
| Cu(1)-S(2)#9        | 2.311(2)  | S(2)#1-Ba(1)-S(1)#5   | 72.17(5)   |
| Cu(1)-S(1)          | 2.316(2)  | S(2)#2-Ba(1)-S(1)#5   | 136.92(5)  |
| Cu(1)-S(2)#2        | 2.416(2)  | S(1)#3-Ba(1)-S(1)#5   | 152.85(7)  |
| Cu(1)-S(1)#3        | 2.423(3)  | S(1)#4-Ba(1)-S(1)#5   | 65.09(3)   |
| Sn(1)-S(1)#14       | 2.386(2)  | S(2)-Ba(1)-S(1)#5     | 75.30(6)   |
| Sn(1)-S(2)#14       | 2.389(2)  | S(2)#5-Ba(1)-S(1)#5   | 71.53(5)   |
| S(2)#1-Ba(1)-S(2)#2 | 132.11(8) | S(1)-Ba(1)-S(1)#5     | 116.99(7)  |
| S(2)#1-Ba(1)-S(1)#3 | 88.53(6)  | S(2)#9-Cu(1)-S(1)     | 134.06(9)  |
| S(2)#2-Ba(1)-S(1)#3 | 70.23(6)  | S(2)#9-Cu(1)-S(2)#2   | 99.33(6)   |
| S(2)#1-Ba(1)-S(1)#4 | 70.23(6)  | S(1)-Cu(1)-S(2)#2     | 108.39(8)  |
| S(2)#2-Ba(1)-S(1)#4 | 88.53(6)  | S(2)#9-Cu(1)-S(1)#3   | 115.15(9)  |
| S(1)#3-Ba(1)-S(1)#4 | 126.71(7) | S(1)-Cu(1)-S(1)#3     | 95.79(6)   |
| S(2)#1-Ba(1)-S(2)   | 144.61(5) | S(2)#2-Cu(1)-S(1)#3   | 99.60(9)   |
| S(2)#2-Ba(1)-S(2)   | 68.16(6)  | S(1)#14-Sn(1)-S(1)    | 105.19(12) |
| S(1)#3-Ba(1)-S(2)   | 126.73(5) | S(1)#14-Sn(1)-S(2)#14 | 106.41(8)  |
| S(1)#4-Ba(1)-S(2)   | 83.79(5)  | S(1)-Sn(1)-S(2)#14    | 117.03(7)  |
| S(2)#1-Ba(1)-S(2)#5 | 68.16(6)  | S(1)#14-Sn(1)-S(2)    | 117.03(7)  |
| S(2)#2-Ba(1)-S(2)#5 | 144.61(5) | S(1)-Sn(1)-S(2)       | 106.41(8)  |
| S(1)#3-Ba(1)-S(2)#5 | 83.79(5)  | S(2)#14-Sn(1)-S(2)    | 105.32(11) |

Symmetry transformations used to generate equivalent atoms:

|                       |                       |                       |
|-----------------------|-----------------------|-----------------------|
| #1 -y+1,x-y,z-1/3     | #2 x-y,-y+1,-z+1/3    | #3 y-1,x,-z           |
| #4 x,y-1,z            | #5 y,x,-z             | #6 x+1,y,z            |
| #7 y,x+1,-z           | #8 -y+1,x-y+1,z-1/3   | #9 x-1,y,z            |
| #10 -x+y,-x+1,z+1/3   | #11 x,y+1,z           | #12 x-y+1,-y+1,-z+1/3 |
| #13 -x+y+1,-x+1,z+1/3 | #14 x-y+1,-y+2,-z+1/3 |                       |

**Table S2(e)** Bond lengths (Å) and angles (°) for BaCu<sub>2</sub>SnSe<sub>4</sub>.

|                       |            |                       |           |
|-----------------------|------------|-----------------------|-----------|
| Ba(1)-Se(3)#1         | 3.311(2)   | Se(2)#3-Ba(1)-Se(1)#5 | 147.11(4) |
| Ba(1)-Se(3)           | 3.311(2)   | Se(1)#4-Ba(1)-Se(1)#5 | 128.05(7) |
| Ba(1)-Se(2)#2         | 3.323(2)   | Se(3)#1-Ba(1)-Se(3)#2 | 152.57(4) |
| Ba(1)-Se(2)#3         | 3.323(2)   | Se(3)-Ba(1)-Se(3)#2   | 67.25(6)  |
| Ba(1)-Se(1)#4         | 3.375(2)   | Se(2)#2-Ba(1)-Se(3)#2 | 73.02(4)  |
| Ba(1)-Se(1)#5         | 3.375(2)   | Se(2)#3-Ba(1)-Se(3)#2 | 76.70(4)  |
| Ba(1)-Se(3)#2         | 3.409(2)   | Se(1)#4-Ba(1)-Se(3)#2 | 135.70(2) |
| Ba(1)-Se(3)#3         | 3.409(2)   | Se(1)#5-Ba(1)-Se(3)#2 | 74.32(4)  |
| Cu(1)-Se(3)#6         | 2.431(3)   | Se(3)#1-Ba(1)-Se(3)#3 | 67.25(6)  |
| Cu(1)-Se(2)#3         | 2.4528(19) | Se(3)-Ba(1)-Se(3)#3   | 152.57(4) |
| Cu(1)-Se(3)#2         | 2.492(2)   | Se(2)#2-Ba(1)-Se(3)#3 | 76.70(4)  |
| Cu(1)-Se(1)           | 2.546(2)   | Se(2)#3-Ba(1)-Se(3)#3 | 73.02(4)  |
| Sn(1)-Se(3)#7         | 2.5266(18) | Se(1)#4-Ba(1)-Se(3)#3 | 74.32(4)  |
| Sn(1)- Se(2)          | 2.545(2)   | Se(1)#5-Ba(1)-Se(3)#3 | 135.70(2) |
| Sn(1)- Se(1)          | 2.509(3)   | Se(3)#6-Cu(1)-Se(3)#2 | 98.23(6)  |
| Sn(1)- Se(3)          | 2.5266(18) | Se(2)#3-Cu(1)-Se(3)#2 | 115.30(7) |
| Se(3)#1-Ba(1)-Se(3)   | 121.00(7)  | Se(3)#6-Cu(1)-Se(1)   | 110.83(6) |
| Se(3)#1-Ba(1)-Se(2)#2 | 83.49(4)   | Se(2)#3-Cu(1)-Se(1)   | 96.01(8)  |
| Se(3)-Ba(1)-Se(2)#2   | 128.24(3)  | Se(3)#2-Cu(1)-Se(1)   | 101.21(7) |
| Se(3)#1-Ba(1)-Se(2)#3 | 128.24(3)  | Se(3)#6-Cu(1)-Cu(1)#7 | 105.04(4) |
| Se(3)-Ba(1)-Se(2)#3   | 83.49(4)   | Se(2)#3-Cu(1)-Cu(1)#7 | 56.64(4)  |
| Se(2)#2-Ba(1)-Se(2)#3 | 118.23(8)  | Se(3)#2-Cu(1)-Cu(1)#7 | 153.10(4) |
| Se(3)#1-Ba(1)-Se(1)#4 | 71.23(5)   | Se(1)-Cu(1)-Cu(1)#7   | 58.01(4)  |
| Se(3)-Ba(1)-Se(1)#4   | 83.71(5)   | Se(1)-Sn(1)-Se(3)#7   | 119.06(4) |
| Se(2)#2-Ba(1)-Se(1)#4 | 147.11(4)  | Se(1)-Sn(1)-Se(3)     | 119.06(4) |
| Se(2)#3-Ba(1)-Se(1)#4 | 67.04(6)   | Se(3)#7-Sn(1)-Se(3)   | 103.15(8) |
| Se(3)#1-Ba(1)-Se(1)#5 | 83.71(5)   | Se(1)-Sn(1)-Se(2)     | 105.11(6) |
| Se(3)-Ba(1)-Se(1)#5   | 71.23(5)   | Se(3)#7-Sn(1)-Se(2)   | 104.34(5) |
| Se(2)#2-Ba(1)-Se(1)#5 | 67.04(6)   | Se(3)-Sn(1)-Se(2)     | 104.34(5) |

Symmetry transformations used to generate equivalent atoms:

|                   |                        |                       |
|-------------------|------------------------|-----------------------|
| #1 -x,-y+1,z      | #2 -x,-y+1/2,z-1/2     | #3 x,y+1/2,z-1/2      |
| #4 x,y+1/2,z+1/2  | #5 -x,-y+1/2,z+1/2     | #6 x,y,z-1            |
| #7 -x+1/2,y,z     | #8 x,y-1/2,z-1/2       | #9 -x+1/2,y-1/2,z-1/2 |
| #10 x,y-1/2,z+1/2 | #11 -x+1/2,y-1/2,z+1/2 | #12 x,y,z+1           |

**Table S3** Calculated NLO SHG coefficients and percentage of VH (Virtual-Hole) and VE (Virtual-Electron) in  $\text{BaCu}_2\text{M}^{\text{IV}}\text{Q}_4$  ( $\text{M}^{\text{IV}} = \text{Si, Ge, and Sn}$ ;  $\text{Q} = \text{S, Se}$ ).

| Compounds                    | SHG coefficients (pm/V) |        |        |
|------------------------------|-------------------------|--------|--------|
|                              | Total                   | VH     | VE     |
| $\text{BaCu}_2\text{SiSe}_4$ | $d_{12} = 4.18$         | 36.53% | 63.47% |
| $\text{BaCu}_2\text{GeS}_4$  | $d_{12} = 0.28$         | 48.46% | 51.54% |
| $\text{BaCu}_2\text{GeSe}_4$ | $d_{12} = 5.62$         | 43.37% | 56.63% |
| $\text{BaCu}_2\text{SnS}_4$  | $d_{12} = 12.09$        | 90.01% | 9.99%  |
| $\text{BaCu}_2\text{SnSe}_4$ | $d_{12} = 1.45$         | 47.72% | 52.28% |

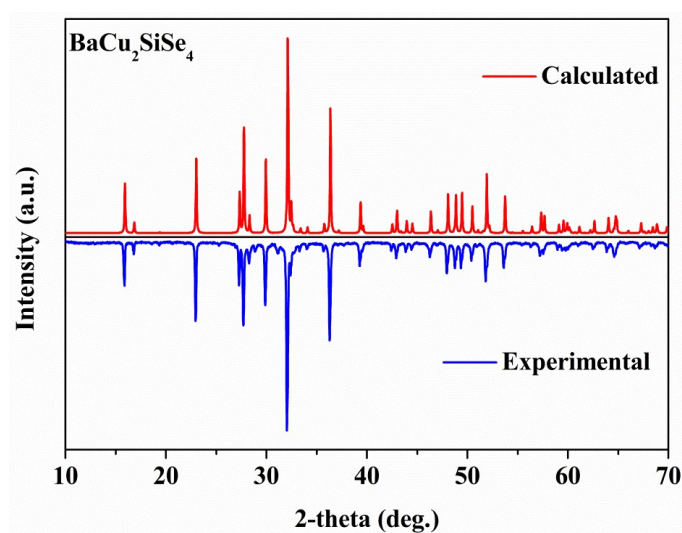

**Fig. S1(a)** Powder XRD patterns of  $\text{BaCu}_2\text{SiSe}_4$ .

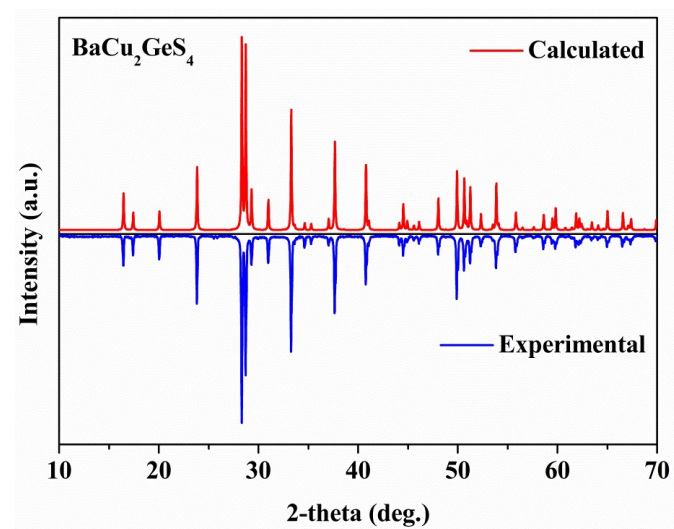

**Fig. S1(b)** Powder XRD patterns of  $\text{BaCu}_2\text{GeS}_4$ .

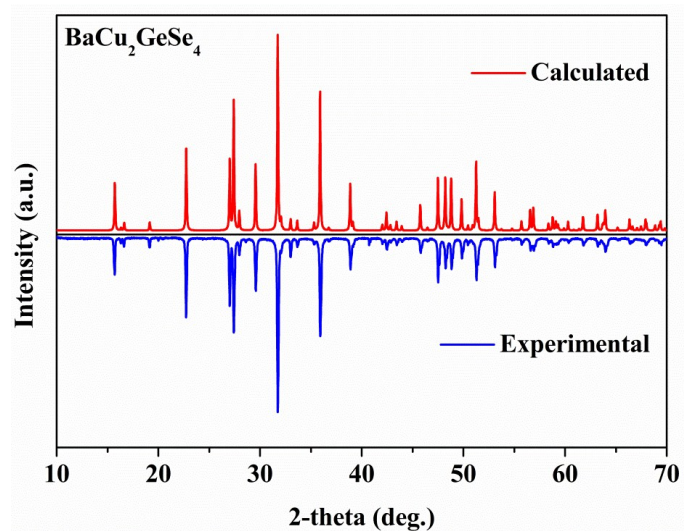

Fig. S1(c) Powder XRD patterns of  $\text{BaCu}_2\text{GeSe}_4$ .

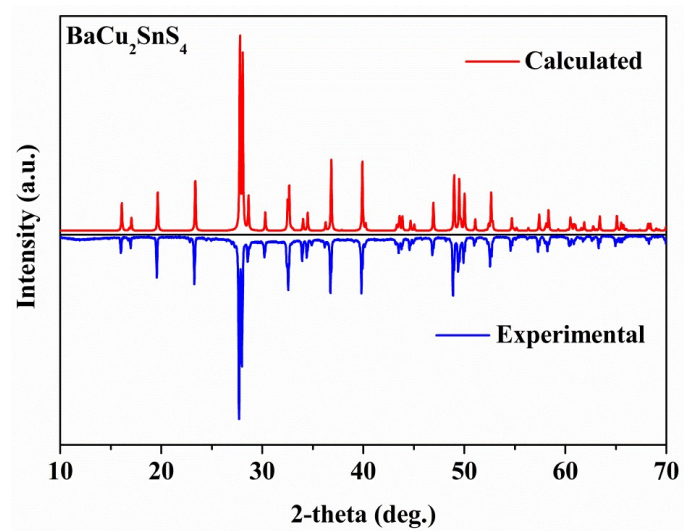

Fig. S1(d) Powder XRD patterns of  $\text{BaCu}_2\text{SnS}_4$ .

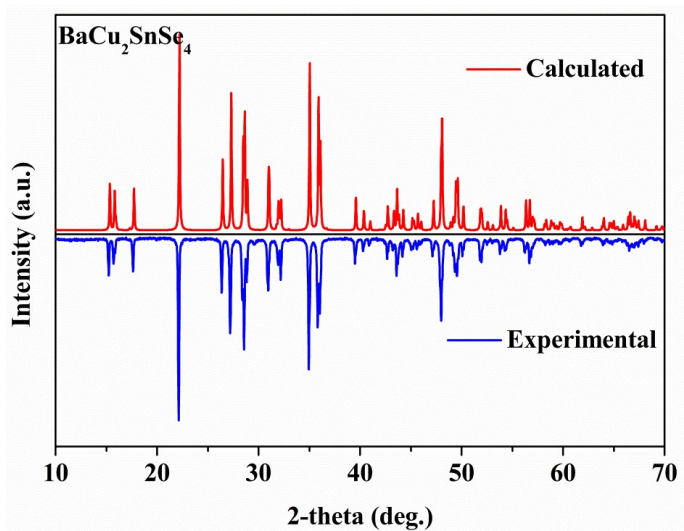

Fig. S1(e) Powder XRD patterns of  $\text{BaCu}_2\text{SnSe}_4$ .

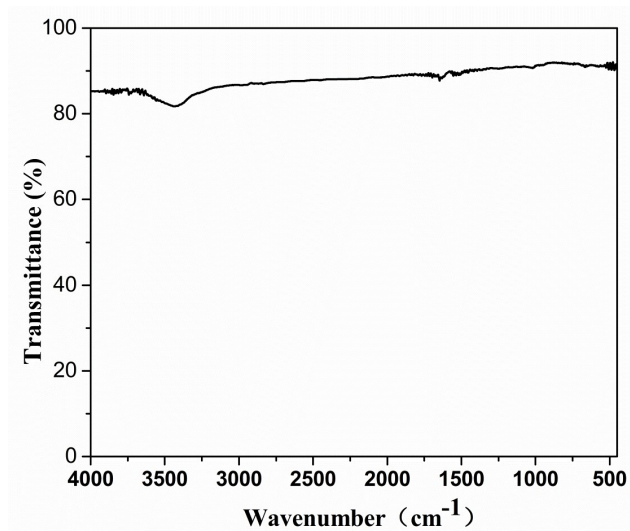

**Fig. S2(a)** The IR spectrum of as-synthesized  $\text{BaCu}_2\text{SiSe}_4$ .

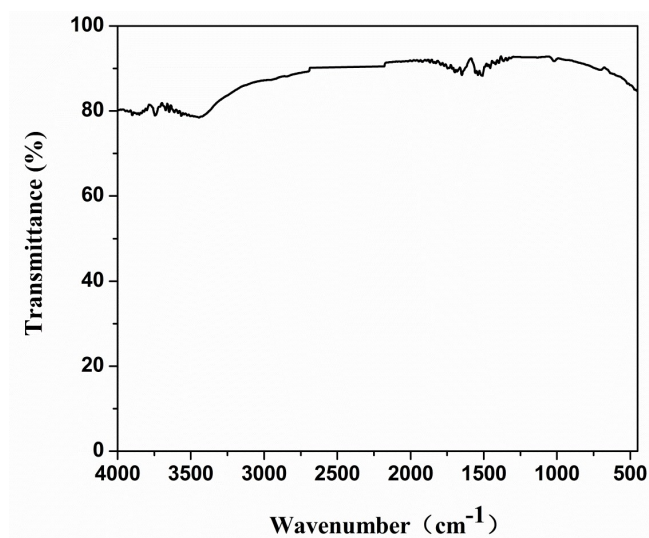

**Fig. S2(b)** The IR spectrum of as-synthesized  $\text{BaCu}_2\text{GeSe}_4$ .

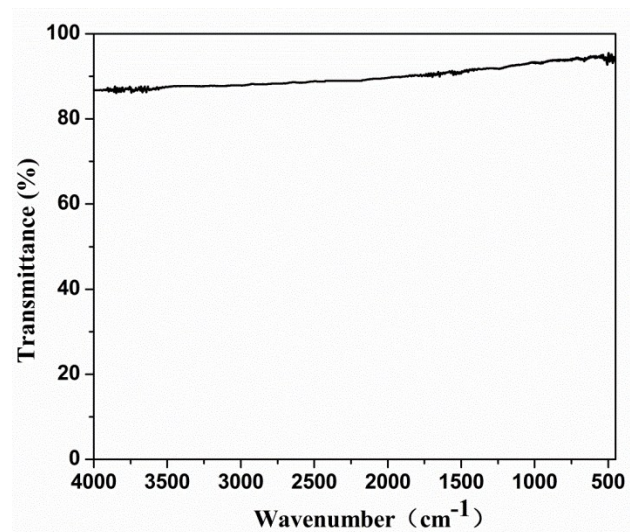

**Fig. S2(c)** The IR spectrum of as-synthesized  $\text{BaCu}_2\text{GeSe}_4$ .

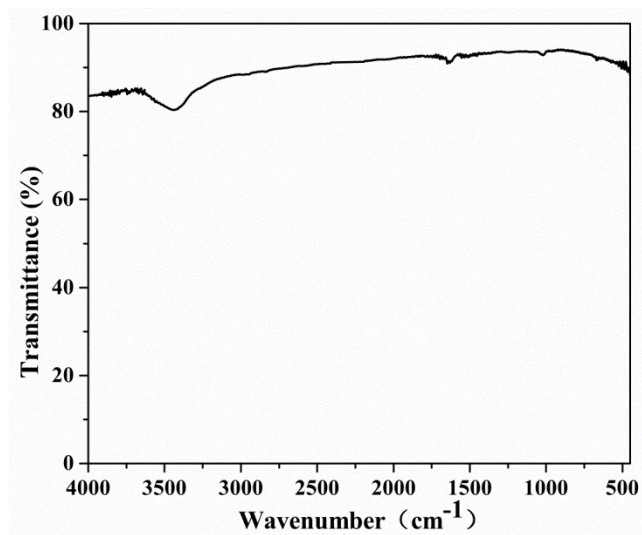

**Fig. S2(d)** The IR spectrum of as-synthesized BaCu<sub>2</sub>SnS<sub>4</sub>.

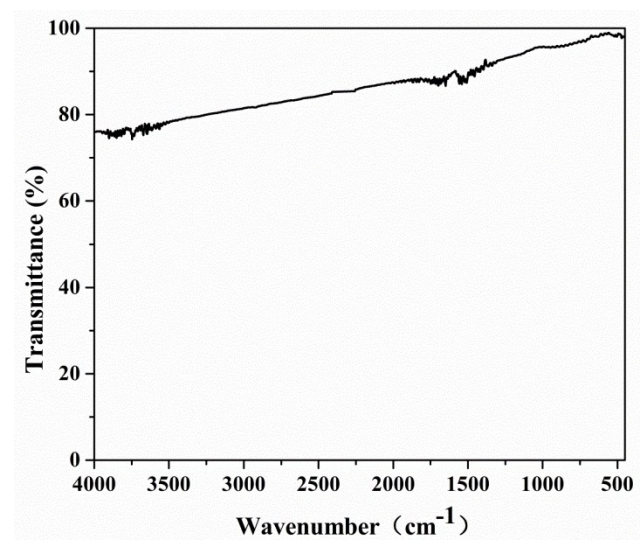

**Fig. S2(e)** The IR spectrum of as-synthesized BaCu<sub>2</sub>SnSe<sub>4</sub>.

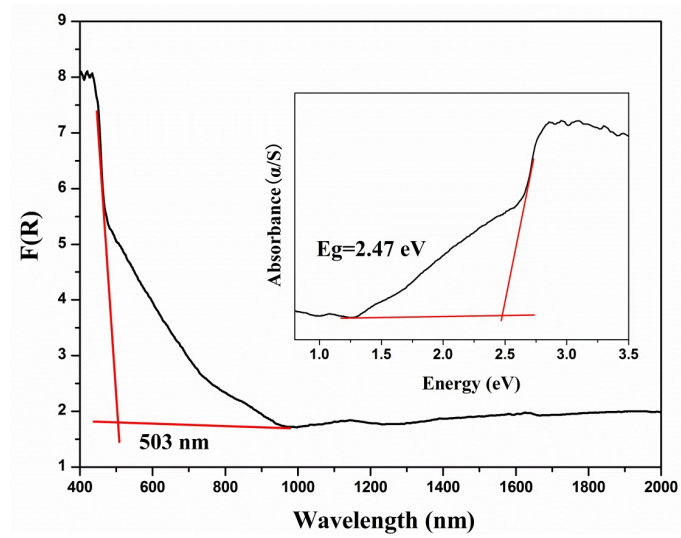

**Fig. S3(a)** Absorption spectrum of BaCu<sub>2</sub>SiSe<sub>4</sub>. The inset diagram is the experimental band gap.

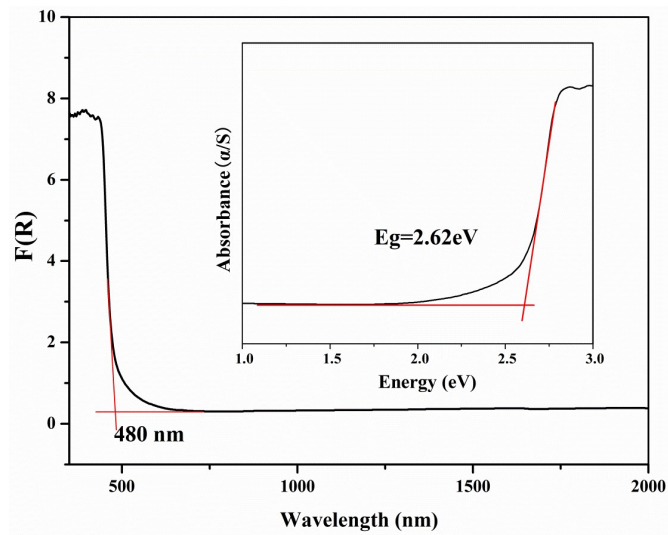

**Fig. S3(b)** Absorption spectrum of BaCu<sub>2</sub>GeS<sub>4</sub>. The inset diagram is the experimental band gap.

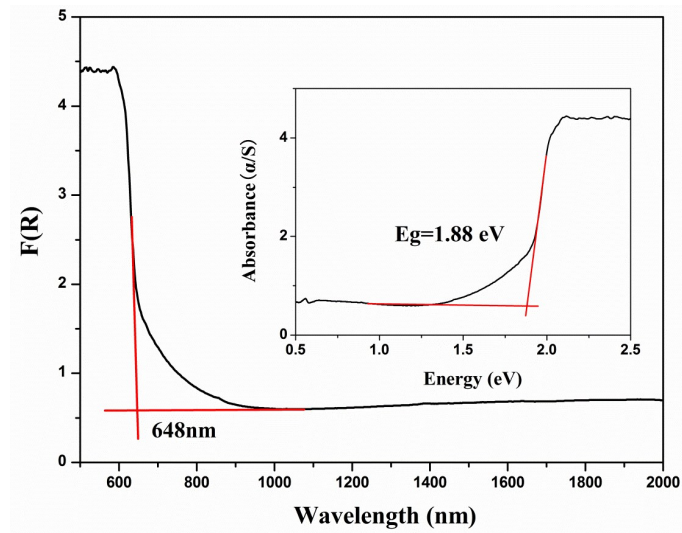

**Fig. S3(c)** Absorption spectrum of BaCu<sub>2</sub>GeSe<sub>4</sub>. The inset diagram is the experimental band gap.

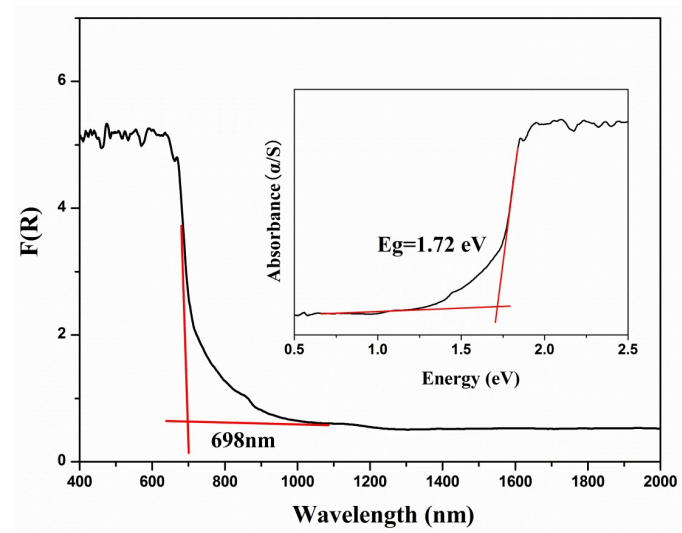

**Fig. S3(d)** Absorption spectrum of BaCu<sub>2</sub>SnSe<sub>4</sub>. The inset diagram is the experimental band gap.



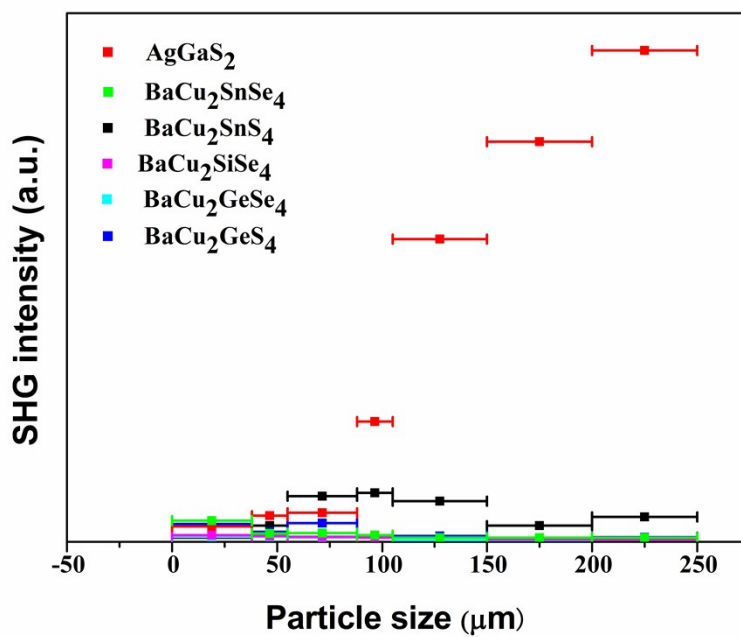

**Fig. S4** SHG response for title compounds in different particle sizes (AgGaS<sub>2</sub> as the reference).

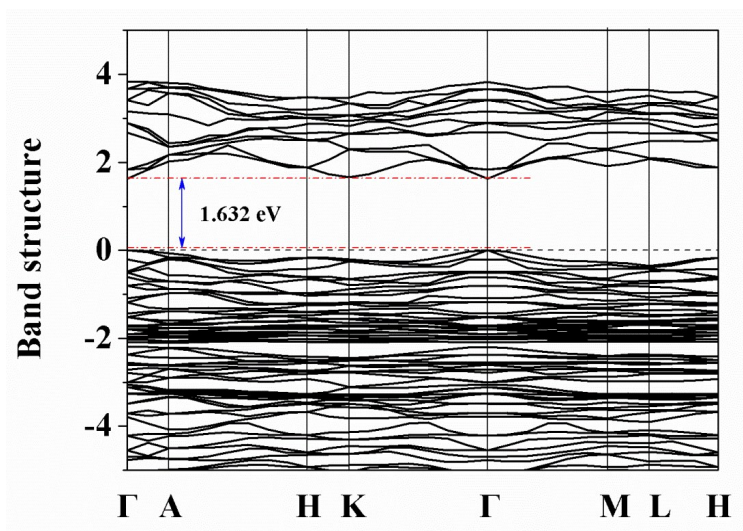

**Fig. S5(a)** The electronic structure of BaCu<sub>2</sub>SiSe<sub>4</sub>.

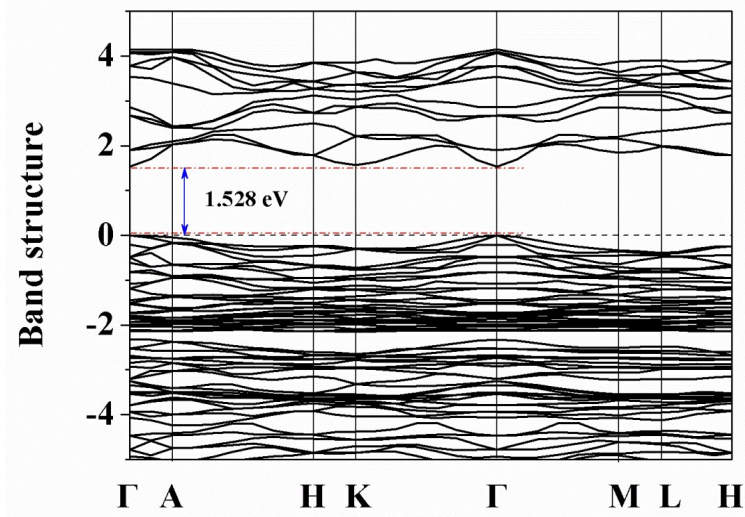

Fig. S5(b) The electronic structure of BaCu<sub>2</sub>GeS<sub>4</sub>.

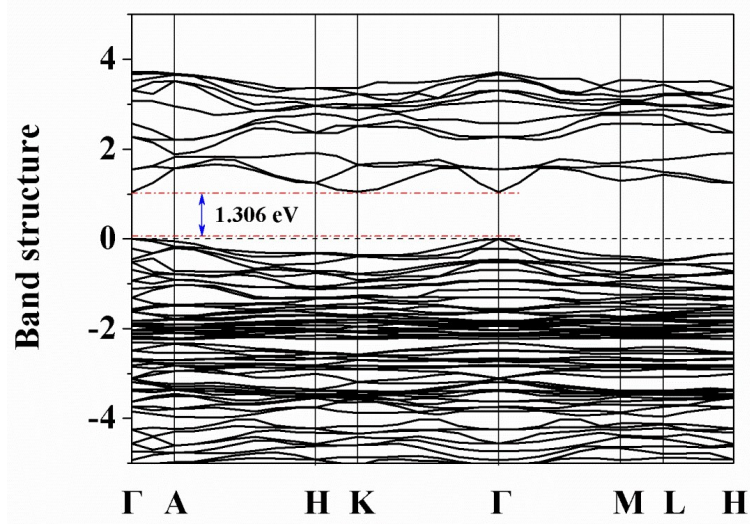

Fig. S5(c) The electronic structure of BaCu<sub>2</sub>GeSe<sub>4</sub>.

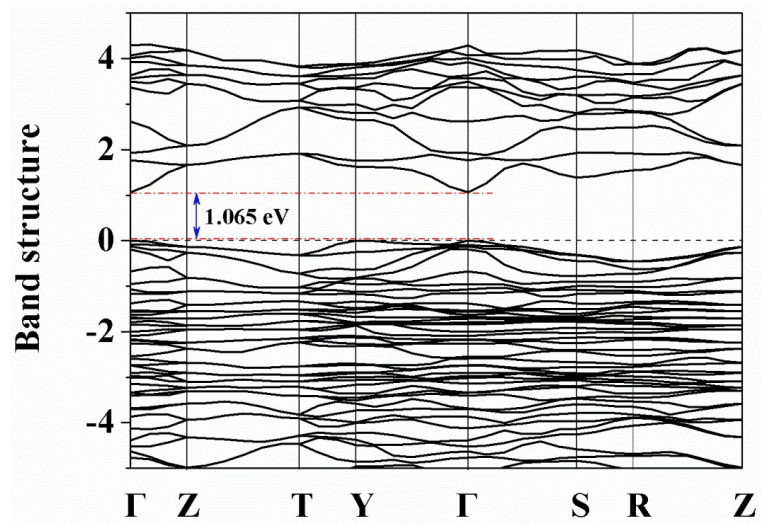

Fig. S5(d) The electronic structure of BaCu<sub>2</sub>SnSe<sub>4</sub>.

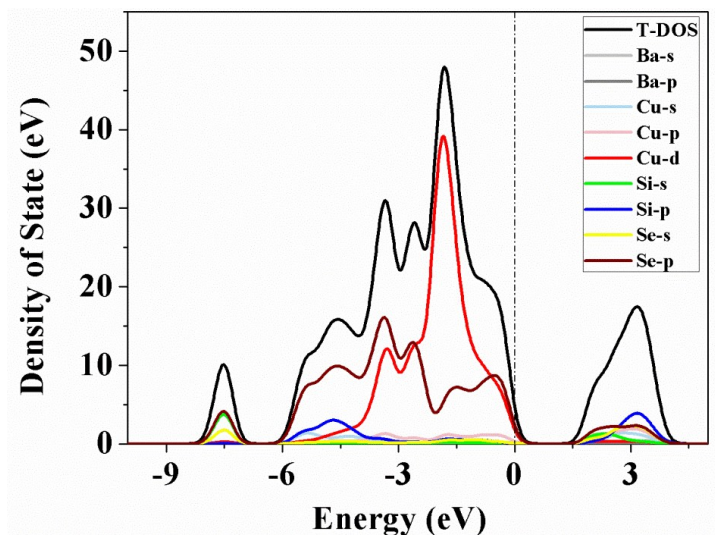

Fig. S6(a) The PDOS of BaCu<sub>2</sub>SiSe<sub>4</sub>.

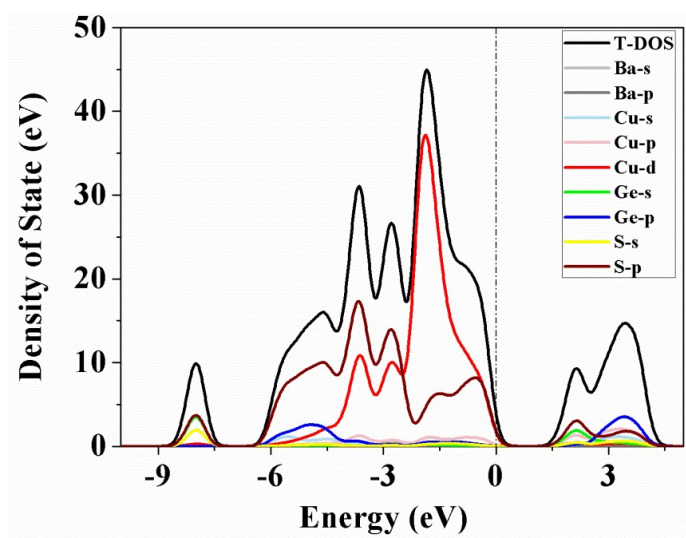

Fig. S6(b) The PDOS of BaCu<sub>2</sub>GeS<sub>4</sub>.

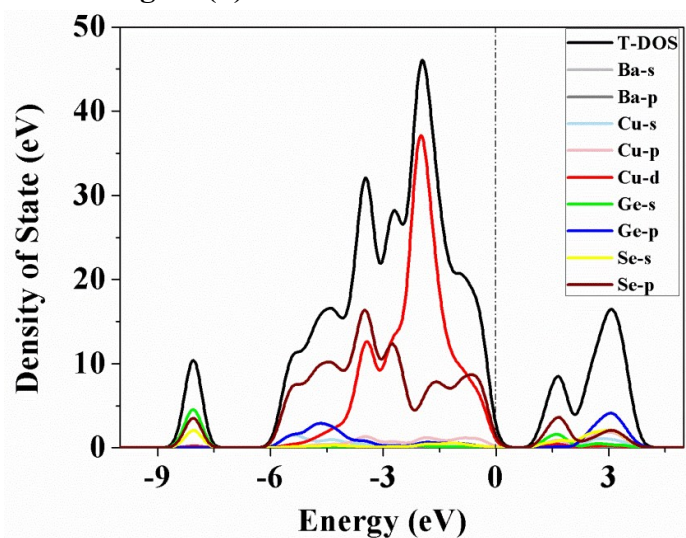

Fig. S6(c) The PDOS of BaCu<sub>2</sub>GeSe<sub>4</sub>.

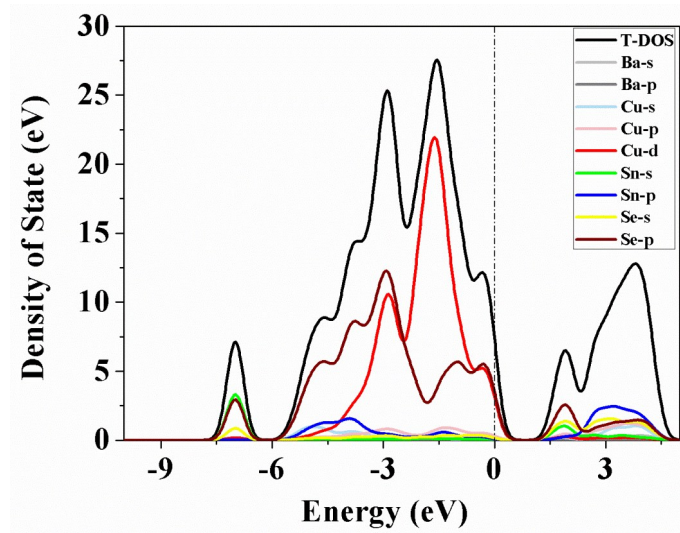

Fig. S6(d) The PDOS of  $\text{BaCu}_2\text{SnSe}_4$ .

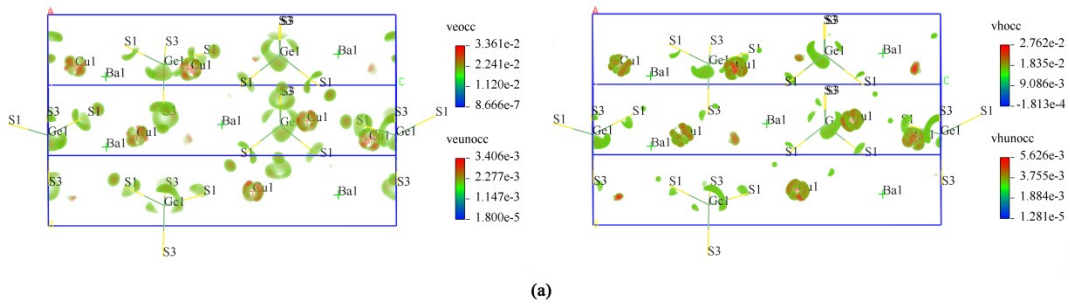

Fig. S7(a) SHG density of  $\text{BaCu}_2\text{GeS}_4$ .

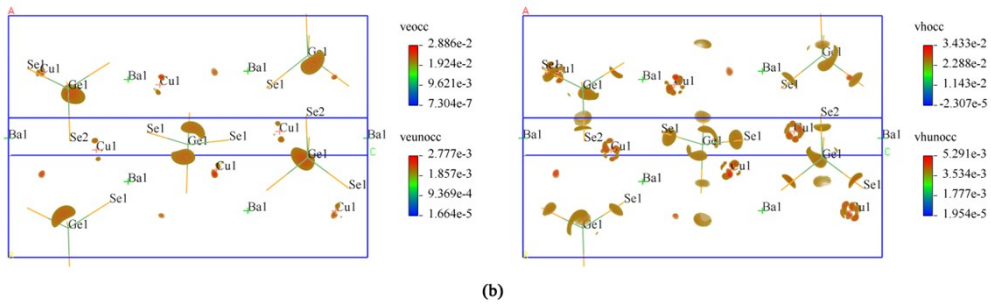

Fig. S7(b) SHG density of  $\text{BaCu}_2\text{GeSe}_4$ .

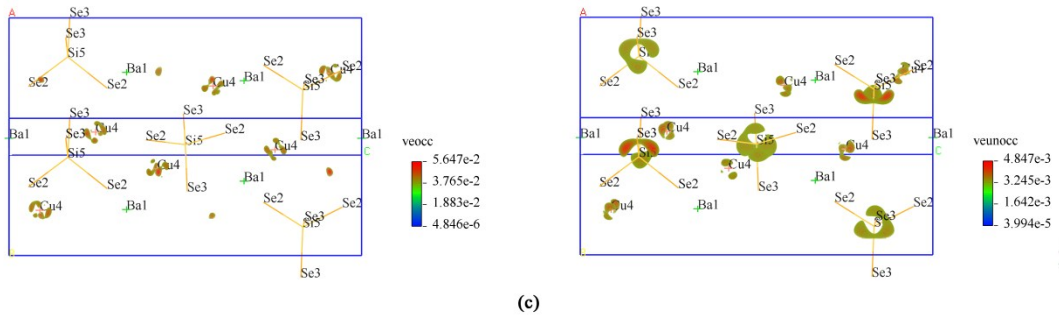

Fig. S7(c) SHG density of  $\text{BaCu}_2\text{SiSe}_4$ .

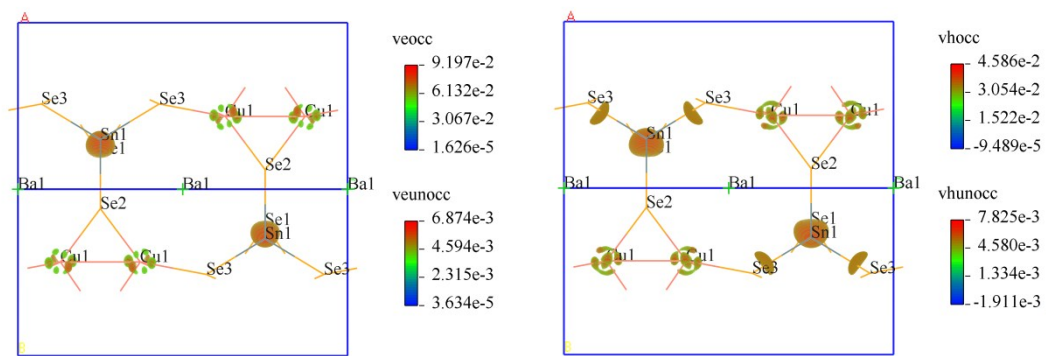

(d)

**Fig. S7(d)** SHG density of  $\text{BaCu}_2\text{SnSe}_4$ .
